# Supplementary material
Source: Springer Nature journal article supplement (https://www.springermedizin.de/resource/supplementary/12889_2012_5336_MOESM5_ESM.pdf/9495124)

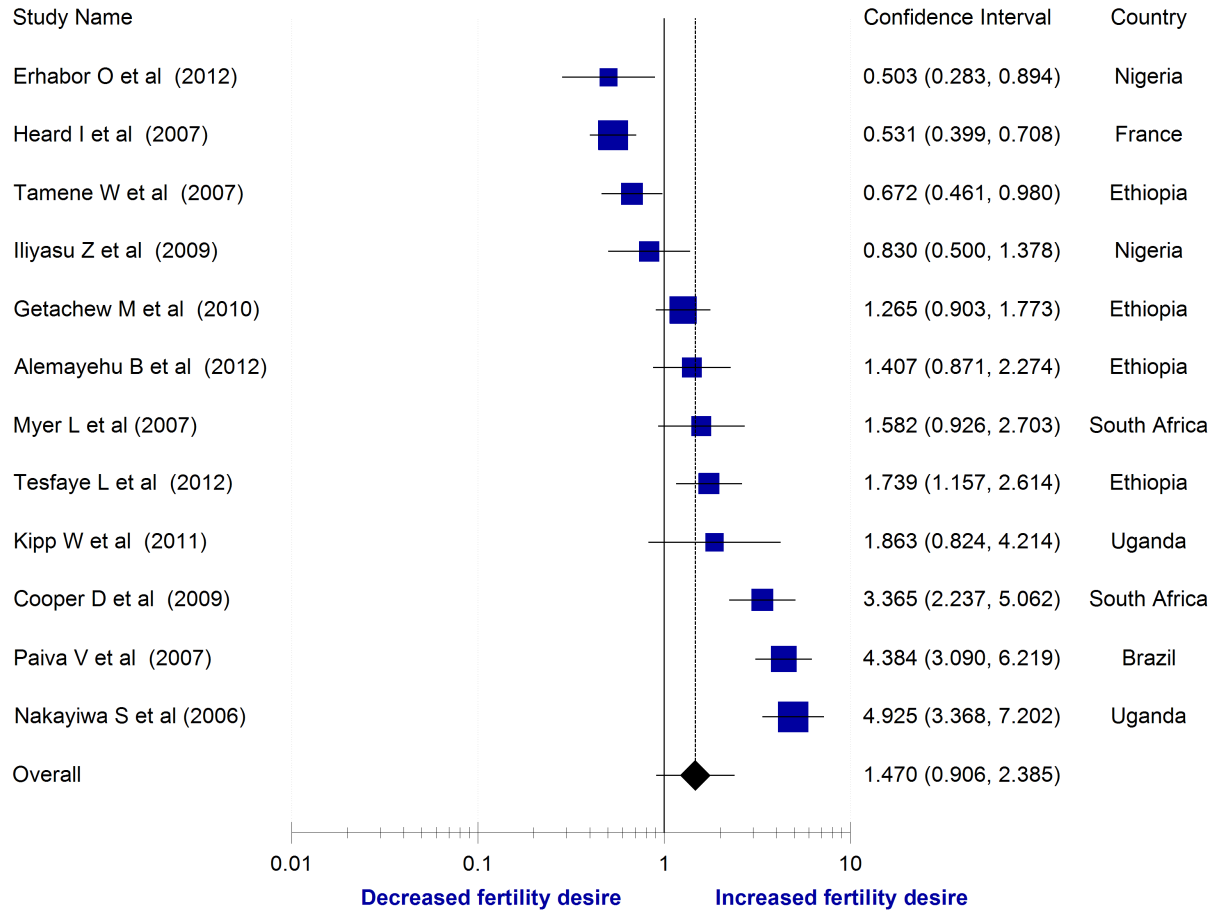

| Heterogeneity test |                |         |        |           |
|--------------------|----------------|---------|--------|-----------|
| Tau <sup>2</sup>   | I <sup>2</sup> | Q       | DF     | P-val (Q) |
| 0.675              | 93.8%          | 177.181 | 11.000 | 0.000     |

Supplement: MOESM5 [file 9495124]
